# Supplementary material
Source: ML conference proceedings conference paper supplement (https://proceedings.mlr.press/v80/diakonikolas18a.html)
Supplement: Supplementary file 1 [file diakonikolas18a-supp.pdf]

## A. Omitted Proofs from Section 4

*Proof of Proposition 4.2.* Let  $\mathcal{F}_{k-1}$  be the natural filtration up to iteration  $k-1$ . Observe that, as  $\nabla_n f(\mathbf{x}_k) = \mathbf{0}$ :

$$\mathbb{E}[\Delta_k | \mathcal{F}_{k-1}] = \nabla f(\mathbf{x}_k). \quad (\text{A.1})$$

Since  $\mathbf{x}_1$  is deterministic (fixed initial point) and the only random variable  $\Delta_1$  depends on is  $i_1$ , we have:

$$\begin{aligned} \mathbb{E}[a_1 \langle \Delta_1, \mathbf{x}_* - \mathbf{x}_1 \rangle] &= a_1 \langle \nabla f(\mathbf{x}_1), \mathbf{x}_* - \mathbf{x}_1 \rangle \\ &= \mathbb{E}[a_1 \langle \nabla f(\mathbf{x}_1), \mathbf{x}_* - \mathbf{x}_1 \rangle]. \end{aligned} \quad (\text{A.2})$$

Let  $k > 1$ . Observe that  $a_j \langle \Delta_j, \mathbf{x}_* - \mathbf{x}_j \rangle$  is measurable with respect to  $\mathcal{F}_{k-1}$  for  $j \leq k-1$ . By linearity of expectation, using (A.1):

$$\mathbb{E}\left[\sum_{j=1}^k a_j \langle \Delta_j, \mathbf{x}_* - \mathbf{x}_j \rangle | \mathcal{F}_{k-1}\right] = a_k \langle \nabla f(\mathbf{x}_k), \mathbf{x}_* - \mathbf{x}_k \rangle + \sum_{j=1}^{k-1} a_j \langle \Delta_j, \mathbf{x}_* - \mathbf{x}_j \rangle.$$

Taking expectations on both sides of the last equality gives a recursion on  $\mathbb{E}[\sum_{j=1}^k a_j \langle \Delta_j, \mathbf{x}_* - \mathbf{x}_j \rangle]$ , which, combined with (A.2), completes the proof.  $\square$

*Proof of Lemma 4.5.* As  $A_{k-1}\Gamma_{k-1}$  is measurable with respect to the natural filtration  $\mathcal{F}_{k-1}$ ,  $\mathbb{E}[A_k\Gamma_k | \mathcal{F}_{k-1}] \leq A_{k-1}\Gamma_{k-1}$  is equivalent to  $\mathbb{E}[A_k\Gamma_k - A_{k-1}\Gamma_{k-1} | \mathcal{F}_{k-1}] \leq 0$ .

The change in the upper bound is:

$$A_k U_k - A_{k-1} U_{k-1} = A_k(f(\mathbf{y}_k) - f(\mathbf{x}_k)) + A_{k-1}(f(\mathbf{x}_k) - f(\mathbf{y}_{k-1})) + a_k f(\mathbf{x}_k).$$

By convexity,  $f(\mathbf{x}_k) - f(\mathbf{y}_{k-1}) \leq \langle \nabla f(\mathbf{x}_k), \mathbf{x}_k - \mathbf{y}_{k-1} \rangle$ . Further, as  $\mathbf{y}_k = \mathbf{x}_k + I_N^{i_k} \frac{a_k}{p_{i_k} A_k} (\mathbf{v}_k - \mathbf{v}_{k-1})$ , we have, by smoothness of  $f(\cdot)$ , that  $f(\mathbf{y}_k) - f(\mathbf{x}_k) \leq \left\langle \nabla f(\mathbf{x}_k), I_N^{i_k} \frac{a_k}{p_{i_k} A_k} (\mathbf{v}_k - \mathbf{v}_{k-1}) \right\rangle + \frac{L_{i_k} a_k^2}{2p_{i_k}^2 A_k^2} \|\mathbf{v}_k - \mathbf{v}_{k-1}\|^2$ . Hence:

$$\begin{aligned} A_k U_k - A_{k-1} U_{k-1} &\leq a_k f(\mathbf{x}_k) + \left\langle \nabla f(\mathbf{x}_k), A_{k-1}(\mathbf{x}_k - \mathbf{y}_{k-1}) + I_N^{i_k} \frac{a_k}{p_{i_k}} (\mathbf{v}_k - \mathbf{v}_{k-1}) \right\rangle + \frac{L_{i_k} a_k^2}{2p_{i_k}^2 A_k^2} \|\mathbf{v}_k - \mathbf{v}_{k-1}\|^2. \end{aligned} \quad (\text{A.3})$$

Let  $m_k(\mathbf{u}) = \sum_{j=1}^k a_j \langle \Delta_j, \mathbf{u} - \mathbf{x}_j \rangle + \sum_{i=1}^n \frac{\sigma_i}{2} \|\mathbf{u}^i - \mathbf{x}_1^i\|^2$  denote the function under the minimum in the definition of  $\Lambda_k$ . Observe that  $m_k(\mathbf{u}) = m_{k-1}(\mathbf{u}) + a_k \langle \Delta_k, \mathbf{u} - \mathbf{x}_k \rangle$  and  $\mathbf{v}_k = \operatorname{argmin}_{\mathbf{u}} m_k(\mathbf{u})$ . Then:

$$\begin{aligned} m_{k-1}(\mathbf{v}_k) &= m_{k-1}(\mathbf{v}_{k-1}) + \langle \nabla m_{k-1}(\mathbf{v}_{k-1}), \mathbf{v}_k - \mathbf{v}_{k-1} \rangle + \sum_{i=1}^{n-1} \frac{\sigma_i}{2} \|\mathbf{v}_k^i - \mathbf{v}_{k-1}^i\|^2 \\ &= m_{k-1}(\mathbf{v}_{k-1}) + \frac{\sigma_{i_k}}{2} \|\mathbf{v}_k^{i_k} - \mathbf{v}_{k-1}^{i_k}\|^2, \end{aligned}$$

as  $\mathbf{v}_k$  and  $\mathbf{v}_{k-1}$  only differ over the block  $i_k$  and  $\mathbf{v}_{k-1} = \operatorname{argmin}_{\mathbf{u}} m_{k-1}(\mathbf{u})$  (and, thus,  $\nabla m_{k-1}(\mathbf{v}_{k-1}) = \mathbf{0}$ ).

Hence, it follows that  $m_k(\mathbf{v}_k) - m_{k-1}(\mathbf{v}_{k-1}) = a_k \langle \Delta_k, \mathbf{v}_k - \mathbf{x}_k \rangle + \frac{\sigma_{i_k}}{2} \|\mathbf{v}_k^{i_k} - \mathbf{v}_{k-1}^{i_k}\|^2$ , and, thus:

$$A_k \Lambda_k - A_{k-1} \Lambda_{k-1} = a_k f(\mathbf{x}_k) + a_k \langle \Delta_k, \mathbf{v}_k - \mathbf{x}_k \rangle + \frac{\sigma_{i_k}}{2} \|\mathbf{v}_k^{i_k} - \mathbf{v}_{k-1}^{i_k}\|^2. \quad (\text{A.4})$$

Combining (A.3) and (A.4):

$$\begin{aligned} A_k \Gamma_k - A_{k-1} \Gamma_{k-1} &\leq \left\langle \nabla f(\mathbf{x}_k), A_{k-1}(\mathbf{x}_k - \mathbf{y}_{k-1}) + I_N^{i_k} \frac{a_k}{p_{i_k}} (\mathbf{v}_k - \mathbf{v}_{k-1}) \right\rangle - a_k \langle \Delta_k, \mathbf{v}_k - \mathbf{x}_k \rangle \\ &\quad + \frac{L_{i_k} a_k^2}{2p_{i_k}^2 A_k^2} \|\mathbf{v}_k^{i_k} - \mathbf{v}_{k-1}^{i_k}\|^2 - \frac{\sigma_{i_k}}{2} \|\mathbf{v}_k^{i_k} - \mathbf{v}_{k-1}^{i_k}\|^2 \\ &\leq \left\langle \nabla f(\mathbf{x}_k), A_{k-1}(\mathbf{x}_k - \mathbf{y}_{k-1}) + I_N^{i_k} \frac{a_k}{p_{i_k}} (\mathbf{v}_k - \mathbf{v}_{k-1}) \right\rangle - a_k \langle \Delta_k, \mathbf{v}_k - \mathbf{x}_k \rangle, \end{aligned}$$

as, by the initial assumptions,  $\frac{a_k^2}{A_k} \leq \frac{p_{i_k}^2 \sigma_{i_k}}{L_{i_k}}$ .

Finally, taking expectations on both sides, and as  $\mathbf{x}_k, \mathbf{y}_{k-1}, \mathbf{v}_{k-1}$  are all measurable w.r.t.  $\mathcal{F}_{k-1}$  and by the separability of the terms in the definition of  $\mathbf{v}_k$ :

$$\mathbb{E}[A_k \Gamma_k - A_{k-1} \Gamma_{k-1} | \mathcal{F}_{k-1}] \leq \langle \nabla f(\mathbf{x}_k), A_k \mathbf{x}_k - A_{k-1} \mathbf{y}_{k-1} - a_k \mathbf{v}_{k-1} \rangle = 0,$$

as, from (AAR-BCD),  $\mathbf{x}_k = \frac{A_{k-1}}{A_k} \mathbf{y}_{k-1} + \frac{a_k}{A_k} \mathbf{v}_{k-1}$ . □

## B. Efficient Implementation of AAR-BCD Iterations

Using similar ideas as in (Ferroq & Richtárik, 2015; Lin et al., 2014; Lee & Sidford, 2013), here we discuss how to efficiently implement iterations of AAR-BCD, without requiring full-vector updates. First, due to the separability of the terms inside the minimum, between successive iterations  $\mathbf{v}_k$  changes only over a single block. This is formalized in the following simple proposition.

**Proposition B.1.** *In each iteration  $k \geq 1$ ,  $\mathbf{v}_k^i = \mathbf{v}_{k-1}^i, \forall i \neq i_k$  and  $\mathbf{v}_k^{i_k} = \mathbf{v}_{k-1}^{i_k} + \mathbf{w}^{i_k}$ , where:*

$$\mathbf{w}^{i_k} = \operatorname{argmin}_{\mathbf{u}^{i_k}} \left\{ a_k \langle \Delta_k^{i_k}, \mathbf{u} \rangle + \frac{\sigma_{i_k}}{2} \|\mathbf{u}^{i_k} - \mathbf{v}_{k-1}^{i_k}\|^2 \right\}.$$

*Proof.* Recall the definition of  $\mathbf{v}_k$ . We have:

$$\begin{aligned} \mathbf{v}_k &= \operatorname{argmin}_{\mathbf{u}} \left\{ \sum_{j=1}^k \langle \Delta_j, \mathbf{u} \rangle + \sum_{i=1}^{n-1} \frac{\sigma_i}{2} \|\mathbf{u}^i - \mathbf{x}_1^i\|^2 \right\} \\ &= \operatorname{argmin}_{\mathbf{u}} \left\{ \sum_{j=1}^{k-1} \langle \Delta_j, \mathbf{u} \rangle + \langle \Delta_k, \mathbf{u} \rangle + \sum_{i=1}^{n-1} \frac{\sigma_i}{2} \|\mathbf{u}^i - \mathbf{x}_1^i\|^2 \right\} \\ &= \operatorname{argmin}_{\mathbf{u}} \left\{ \sum_{j=1}^{k-1} \langle \Delta_j, \mathbf{u} \rangle + \langle \Delta_k^{i_k}, \mathbf{u}^{i_k} \rangle + \sum_{i=1}^{n-1} \frac{\sigma_i}{2} \|\mathbf{u}^i - \mathbf{x}_1^i\|^2 \right\} \\ &= \mathbf{v}_{k-1} + \operatorname{argmin}_{\mathbf{u}^{i_k}} \left\{ \langle \Delta_k^{i_k}, \mathbf{u}^{i_k} \rangle + \frac{\sigma_{i_k}}{2} \|\mathbf{u}^{i_k} - \mathbf{v}_{k-1}^{i_k}\|^2 \right\}, \end{aligned}$$

where the third equality is by the definition of  $\Delta_k$  ( $\Delta_k^i = 0$  for  $i \neq i_k$ ) and the last equality follows from block-separability of the terms under the min. □

Since  $\mathbf{v}_k$  only changes over a single block, this will imply that the changes in  $\mathbf{x}_k$  and  $\mathbf{y}_k$  can be localized. In particular, let us observe the patterns in changes between successive iterations. We have that,  $\forall i \neq n$ :

$$\mathbf{x}_k^i = \frac{A_{k-1}}{A_k} \mathbf{y}_{k-1}^i + \frac{a_k}{A_k} \mathbf{v}_{k-1}^i = \frac{A_{k-1}}{A_k} (\mathbf{y}_{k-1}^i - \mathbf{v}_{k-1}^i) + \mathbf{v}_{k-1}^i \quad (\text{B.1})$$

and

$$\begin{aligned} \mathbf{y}_k^i &= \mathbf{x}_k^i + \frac{1}{p_i} \frac{a_k}{A_k} (\mathbf{v}_k^i - \mathbf{v}_{k-1}^i) \\ &= \frac{A_{k-1}}{A_k} (\mathbf{y}_{k-1}^i - \mathbf{v}_{k-1}^i) + \left( 1 - \frac{1}{p_i} \frac{a_k}{A_k} \right) (\mathbf{v}_{k-1}^i - \mathbf{v}_k^i) + \mathbf{v}_k^i. \end{aligned} \quad (\text{B.2})$$

Due to Proposition B.1,  $\mathbf{v}_k$  and  $\mathbf{v}_{k-1}$  can be computed without full-vector operations (assuming the gradients can be computed without full-vector operations, which we will show later in this section). Hence, we need to show that it is possible to replace  $\frac{A_{k-1}}{A_k} (\mathbf{y}_{k-1}^i - \mathbf{v}_{k-1}^i)$  with a quantity that can be computed without the full-vector operations. Observe that  $\mathbf{y}_0 - \mathbf{v}_0 = 0$  (from the initialization of (AAR-BCD)) and that, from (B.2):

$$\mathbf{y}_k^i - \mathbf{v}_k^i = \frac{A_{k-1}}{A_k} (\mathbf{y}_{k-1}^i - \mathbf{v}_{k-1}^i) + \left( 1 - \frac{1}{p_i} \frac{a_k}{A_k} \right) (\mathbf{v}_{k-1}^i - \mathbf{v}_k^i).$$

Dividing both sides by  $\frac{a_k^2}{A_k^2}$  and assuming that  $\frac{a_k^2}{A_k}$  is constant over iterations, we get:

$$\frac{A_k^2}{a_k^2} (\mathbf{y}_k^i - \mathbf{v}_k^i) = \frac{A_{k-1}^2}{a_{k-1}^2} (\mathbf{y}_{k-1}^i - \mathbf{v}_{k-1}^i) + \frac{A_k^2}{a_k^2} \left(1 - \frac{1}{p_i} \frac{a_k}{A_k}\right) (\mathbf{v}_{k-1}^i - \mathbf{v}_k^i). \quad (\text{B.3})$$

Let  $N_n$  denote the size of the  $n^{\text{th}}$  block and define the  $(N - N_n)$ -length vector  $\mathbf{u}_k$  by  $\mathbf{u}_k^i = \frac{A_k^2}{a_k^2} (\mathbf{y}_k^i - \mathbf{v}_k^i)$ ,  $\forall i \neq n$ . Then (from (B.3))  $\mathbf{u}_k^i = \mathbf{u}_{k-1}^i + \frac{A_k^2}{a_k^2} \left(1 - \frac{1}{p_i} \frac{a_k}{A_k}\right) (\mathbf{v}_{k-1}^i - \mathbf{v}_k^i)$ , and, hence, in iteration  $k$ ,  $\mathbf{u}_k$  changes only over block  $i_k$ . Combining with (B.1) and (B.2), we have the following lemma.

**Lemma B.2.** Assume that  $\frac{a_k^2}{A_k}$  is kept constant over the iterations of AAR-BCD. Let  $\mathbf{u}_k$  be the  $(N - N_n)$ -dimensional vector defined recursively as  $\mathbf{u}_0 = \mathbf{0}$ ,  $\mathbf{u}_k^i = \mathbf{u}_{k-1}^i$  for  $i \in \{1, \dots, n-1\}$ ,  $i \neq i_k$  and  $\mathbf{u}_k^{i_k} = \mathbf{u}_{k-1}^{i_k} + \frac{A_k^2}{a_k^2} \left(1 - \frac{1}{p_i} \frac{a_k}{A_k}\right) (\mathbf{v}_{k-1}^{i_k} - \mathbf{v}_k^{i_k})$ . Then,  $\forall i \in \{1, \dots, n-1\}$ :  $\mathbf{x}_k^i = \frac{a_k^2}{A_k^2} \mathbf{u}_{k-1}^i + \mathbf{v}_{k-1}^i$  and  $\mathbf{y}_k^i = \frac{a_k^2}{A_k^2} \mathbf{u}_{k-1}^i + \left(1 - \frac{1}{p_i} \frac{a_k}{A_k}\right) (\mathbf{v}_{k-1}^i - \mathbf{v}_k^i) + \mathbf{v}_k^i$ .

Note that we will never need to explicitly compute  $\mathbf{x}_k, \mathbf{y}_k$ , except for the last iteration  $K$ , which outputs  $\mathbf{y}_K$ . To formalize this claim, we need to show that we can compute the gradients  $\nabla_i f(\mathbf{x}_k)$  without explicitly computing  $\mathbf{x}_k$  and that we can efficiently perform the exact minimization over the  $n^{\text{th}}$  block. This will only be possible by assuming specific structure of the objective function, as is typical for accelerated block-coordinate descent methods (Fercoq & Richtárik, 2015; Lee & Sidford, 2013; Lin et al., 2014). In particular, we assume that for some  $m \times N$  dimensional matrix  $\mathbf{M}$ :

$$f(\mathbf{x}) = \sum_{j=1}^m \phi_j(e_j^T \mathbf{M} \mathbf{x}) + \psi(\mathbf{x}), \quad (\text{B.4})$$

where  $\phi_j : \mathbb{R} \rightarrow \mathbb{R}$  and  $\psi = \sum_{i=1}^n \psi_i : \mathbb{R}^N \rightarrow \mathbb{R}$  is block-separable.

**Efficient Gradient Computations.** Assume for now that  $\mathbf{x}_k^n$  can be computed efficiently (we will address this at the end of this section). Let  $\text{ind}$  denote the set of indices of the coordinates from blocks  $\{1, 2, \dots, n-1\}$  and denote by  $\mathbf{B}$  the matrix obtained by selecting the columns of  $\mathbf{M}$  that are indexed by  $\text{ind}$ . Similarly, let  $\text{ind}_n$  denote the set of indices of the coordinates from block  $n$  and let  $\mathbf{C}$  denote the submatrix of  $\mathbf{M}$  obtained by selecting the columns of  $\mathbf{M}$  that are indexed by  $\text{ind}_n$ . Denote  $\mathbf{r}_{\mathbf{u}_k} = \mathbf{B} \mathbf{u}_k$ ,  $\mathbf{r}_{\mathbf{v}_k} = \mathbf{B} [\mathbf{v}_k^1, \mathbf{v}_k^2, \dots, \mathbf{v}_k^{n-1}]^T$ ,  $\mathbf{r}_n = \mathbf{C} \mathbf{x}_k^n$ . Let  $\text{ind}_{i_k}$  be the set of indices corresponding to the coordinates from block  $i_k$ . Then:

$$\nabla_{i_k} f(\mathbf{x}_k) = \sum_{j=1}^m (\mathbf{M}_{j, \text{ind}_{i_k}})^T \phi_j' \left( \frac{a_k^2}{A_k^2} \mathbf{r}_{\mathbf{u}_{k-1}}^j + \mathbf{r}_{\mathbf{v}_{k-1}}^j + \mathbf{r}_n^j \right) + \nabla_{i_k} \psi(\mathbf{x}). \quad (\text{B.5})$$

Hence, as long as we maintain  $\mathbf{r}_{\mathbf{u}_k}, \mathbf{r}_{\mathbf{v}_k}$ , and  $\mathbf{r}_n$  (which do not require full-vector operations), we can efficiently compute the partial gradients  $\nabla_{i_k} f(\mathbf{x}_k)$  without ever needing to perform any full-vector operations.

**Efficient Exact Minimization.** Suppose first that  $\psi(\mathbf{x}) \equiv 0$ . Then:

$$\mathbf{r}_n = \underset{\mathbf{r} \in \mathbb{R}^m}{\text{argmin}} \left\{ \sum_{j=1}^m \phi_j \left( \frac{a_k^2}{A_k^2} \mathbf{r}_{\mathbf{u}_{k-1}}^j + \mathbf{r}_{\mathbf{v}_{k-1}}^j + \mathbf{r}^j \right) \right\},$$

and  $\mathbf{r}_n$  can be computed but solving  $m$  single-variable minimization problems, which can be done in closed form or with a very low complexity. Computing  $\mathbf{r}_n$  is sufficient for defining all algorithm iterations, except for the last one (that outputs a solution). Hence, we only need to compute  $\mathbf{x}_k^n$  once – in the last iteration.

More generally,  $\mathbf{x}_k^n$  is determined by solving:

$$\mathbf{x}_k^n = \underset{\mathbf{x} \in \mathbb{R}^{N_n}}{\text{argmin}} \left\{ \sum_{j=1}^m \phi_j \left( \frac{a_k^2}{A_k^2} \mathbf{r}_{\mathbf{u}_{k-1}}^j + \mathbf{r}_{\mathbf{v}_{k-1}}^j + (\mathbf{C} \mathbf{x})^j \right) + \psi_n(\mathbf{x}) \right\}.$$

When  $m$  and  $N_n$  are small, high-accuracy polynomial-time convex optimization algorithms are computationally inexpensive, and  $\mathbf{x}_k^n$  can be computed efficiently.

---

### Alternating Randomized Block Coordinate Descent

---

In the special case of linear and ridge regression,  $\mathbf{x}_k^n$  can be computed in closed form, with minor preprocessing. In particular, if  $\mathbf{b}$  is the vector of labels, then the problem becomes:

$$\mathbf{x}_k^n = \operatorname{argmin}_{\mathbf{x} \in \mathbb{R}^{N_n}} \left\{ \sum_{j=1}^m \left( \frac{a_k^2}{A_k^2} \mathbf{r}_{\mathbf{u}_{k-1}}^j + \mathbf{r}_{\mathbf{v}_{k-1}}^j + (\mathbf{C}\mathbf{x})^j - \mathbf{b}^j \right)^2 + \frac{\lambda}{2} \|\mathbf{x}\|_2^2 \right\},$$

where  $\lambda = 0$  in the case of (simple) linear regression. Let  $\mathbf{b}' = \mathbf{b} - \frac{a_k^2}{A_k^2} \mathbf{r}_{\mathbf{u}_{k-1}} - \mathbf{r}_{\mathbf{v}_{k-1}}$ . Then:

$$\mathbf{x}_k^n = (\mathbf{C}^T \mathbf{C} + \lambda \mathbf{I})^\dagger (\mathbf{C}^T \mathbf{b}'),$$

where  $(\cdot)^\dagger$  denotes the matrix pseudoinverse, and  $\mathbf{I}$  is the identity matrix. Since  $\mathbf{C}^T \mathbf{C} + \lambda \mathbf{I}$  does not change over iterations,  $(\mathbf{C}^T \mathbf{C} + \lambda \mathbf{I})^\dagger$  can be computed only once at the initialization. Recall that  $\mathbf{C}^T \mathbf{C} + \lambda \mathbf{I}$  is an  $N_n \times N_n$  matrix, where  $N_n$  is the size of the  $n^{\text{th}}$  block, and thus inverting  $\mathbf{C}^T \mathbf{C} + \lambda \mathbf{I}$  is computationally inexpensive as long as  $N_n$  is not too large. This reduces the overall per-iteration cost of the exact minimization to about the same cost as for performing gradient steps.
